# Supplementary material for: Genetic variation and association mapping for 12 agronomic traits in indica rice
Source: PubMed Central journal article supplement (PMC4681178; doi:10.1186/s12864-015-2245-2), 2015-12-16
Supplement: 12864_2015_2245_MOESM4_ESM.pdf [file 12864_2015_2245_MOESM4_ESM.pdf]

Table S3. The population differentiation statistics ( $F_{ST}$ ) between pairwise subpopulations.

| 523 whole panel |      | 469 <i>indica</i> panel |      |      |      |      |
|-----------------|------|-------------------------|------|------|------|------|
| <i>japonica</i> |      | POP1                    | POP2 | POP3 | POP4 |      |
| <i>indica</i>   | 0.56 | POP2                    | 0.24 |      |      |      |
|                 |      | POP3                    | 0.24 | 0.23 |      |      |
|                 |      | POP4                    | 0.25 | 0.18 | 0.22 |      |
|                 |      | Mixed                   | 0.13 | 0.10 | 0.05 | 0.07 |
