# Supplementary material for: Genetic variation and association mapping for 12 agronomic traits in indica rice
Source: PubMed Central journal article supplement (PMC4681178; doi:10.1186/s12864-015-2245-2), 2015-12-16
Supplement: 12864_2015_2245_MOESM8_ESM.pdf [file 12864_2015_2245_MOESM8_ESM.pdf]

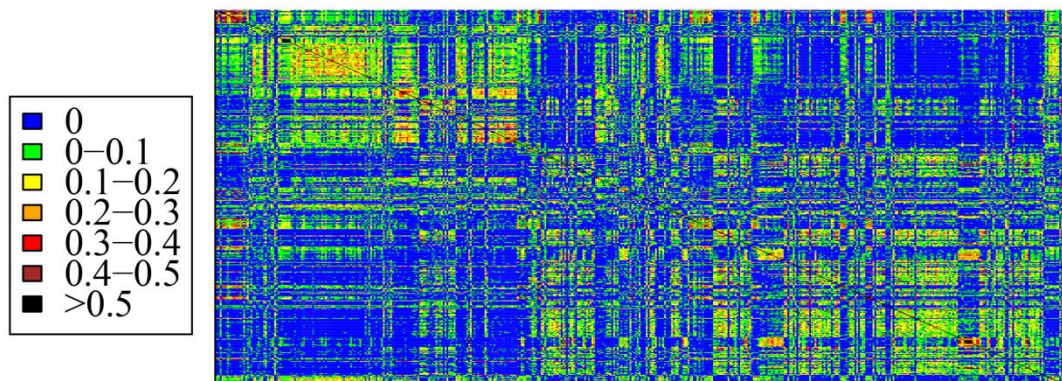

Figure S3. Heatmap of pairwise relative kinship values. Individuals are ordered according 469 *indica* accession ID and each pixel in the square indicates the range of kinship value as shown in the left colored legend.
