# Supplementary material for: Genetic variation and association mapping for 12 agronomic traits in indica rice
Source: PubMed Central journal article supplement (PMC4681178; doi:10.1186/s12864-015-2245-2), 2015-12-16
Supplement: 12864_2015_2245_MOESM9_ESM.pdf [file 12864_2015_2245_MOESM9_ESM.pdf]

Table S6. Linkage disequilibrium (LD) decay distance of the 12 chromosomes.

| Chromosome  | Regression equation         | $R^2$ <sup>a</sup> | $r_{max}^2$ <sup>b</sup> | LD decay distance <sup>c</sup> |
|-------------|-----------------------------|--------------------|--------------------------|--------------------------------|
| 1           | $y = -0.091\ln(x) + 0.693$  | 0.8272             | 0.5503                   | 98.67                          |
| 2           | $y = -0.11\ln(x) + 0.7738$  | 0.9279             | 0.4891                   | 122.90                         |
| 3           | $y = -0.115\ln(x) + 0.8756$ | 0.8257             | 0.5640                   | 174.47                         |
| 4           | $y = -0.079\ln(x) + 0.6695$ | 0.7210             | 0.5581                   | 140.11                         |
| 5           | $y = -0.113\ln(x) + 0.8267$ | 0.8157             | 0.6215                   | 96.15                          |
| 6           | $y = -0.087\ln(x) + 0.7311$ | 0.8777             | 0.4810                   | 281.20                         |
| 7           | $y = -0.062\ln(x) + 0.6146$ | 0.5639             | 0.4798                   | 421.39                         |
| 8           | $y = -0.085\ln(x) + 0.6495$ | 0.8616             | 0.4157                   | 180.53                         |
| 9           | $y = -0.066\ln(x) + 0.5911$ | 0.6425             | 0.4595                   | 238.65                         |
| 10          | $y = -0.09\ln(x) + 0.7435$  | 0.7417             | 0.4597                   | 301.03                         |
| 11          | $y = -0.094\ln(x) + 0.7203$ | 0.9020             | 0.5078                   | 142.84                         |
| 12          | $y = -0.084\ln(x) + 0.7233$ | 0.6779             | 0.4494                   | 378.31                         |
| Average     |                             |                    |                          | 214.69                         |
| Whole panel | $y = -0.133\ln(x) + 0.9733$ | 0.9422             | 0.6978                   | 109.37                         |

<sup>a</sup> coefficient of determination; <sup>b</sup> the maximum of correlation coefficient; <sup>c</sup> the distance (kb) is at which the  $r^2$  dropped to half of the  $r_{max}^2$ .
